# Supplementary material for: Visualization of stem cell activity in pancreatic cancer expansion by direct lineage tracing with live imaging
Source: eLife journal article supplement (doi:10.7554/elife.55117), 2021-01-04

# Figure 3-figure supplement 1

**A**

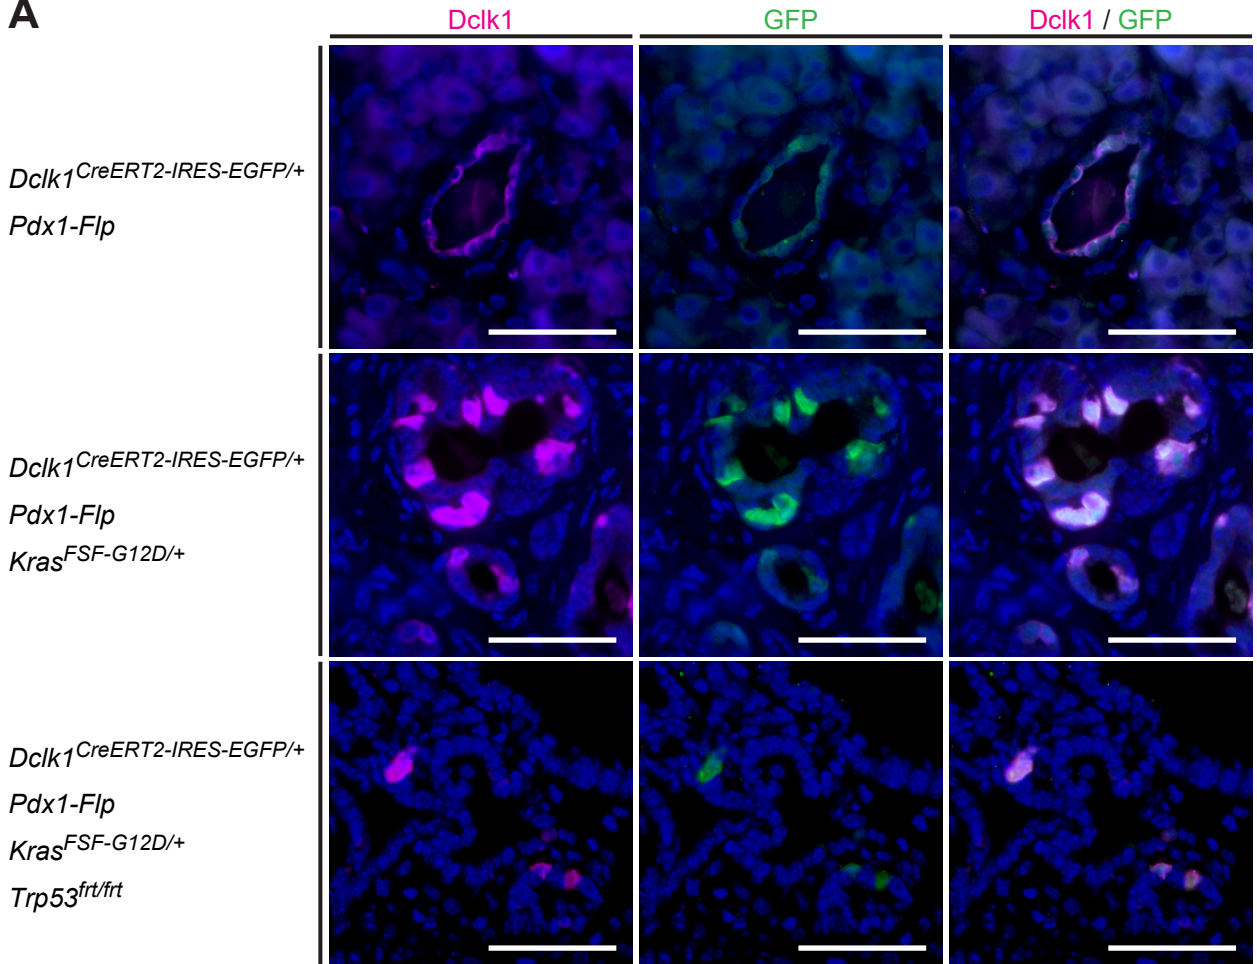

**B** % of EGFP<sup>+</sup> cells in Dclk1<sup>-</sup> cells of pancreatic epithelium

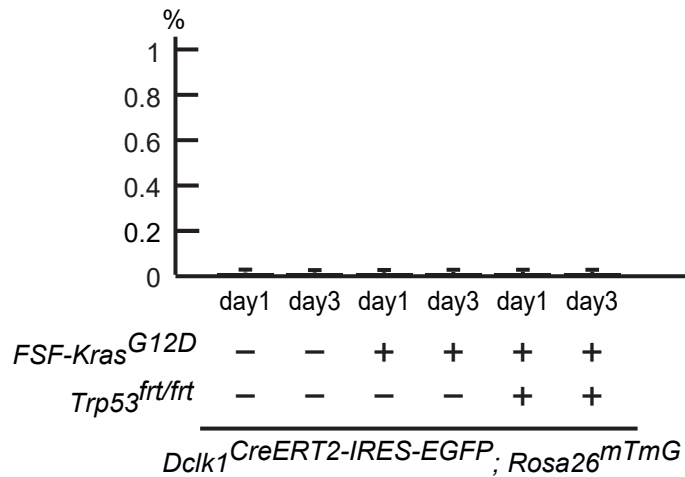

Supplement: supp [file elife-55117-supp-v1.zip]
